# Supplementary material for: A microarray-based transcriptomic time-course of hyper- and hypo-osmotic stress signaling events in the euryhaline fishGillichthys mirabilis:osmosensors to effectors
Source: Oxford University Press journal article supplement (doi:10.1242/jeb.022160), 2008-10-31
Supplement: jeb022160tables1.pdf [file jeb022160tables1.pdf]

Table S1. Expression data tables of significant genes not presented in main figures

| A. Upstream signaling genes during osmotic stress in <i>Gillichthys mirabilis</i>              |                                                                    |                     |                |                                |                                     |
|------------------------------------------------------------------------------------------------|--------------------------------------------------------------------|---------------------|----------------|--------------------------------|-------------------------------------|
| Gene product                                                                                   | Putative function during osmotic stress                            | Functional category | Osmotic stress | Significant expression<br>Time | Max fold change                     |
| Transforming growth factor $\beta$ (TGF- $\beta$ ) II receptor                                 | Propagation of transforming growth factor $\beta$ signaling        | Signaling           | Hypo           | 12                             | 1.68 $\pm$ 0.10                     |
| Prostaglandin E2 synthase                                                                      | Regulation of prostaglandin production – water permeability        | Signaling           | Hyper          | 12                             | -1.25 $\pm$ 0.08                    |
| Estradiol-17- $\beta$ dehydrogenase                                                            | Regulation of estradiol production                                 | Signaling           | Hypo           | 12                             | -1.61 $\pm$ 0.10                    |
| Neural derived orphan receptor1 (NOR-1)                                                        | Regulation of steroid receptor activity                            | Signaling           | Hyper          | 4, 12                          | 1.52 $\pm$ 0.11                     |
| Proline rich nuclear receptor coactivator 2 (PNRC-2)                                           | Activation of nuclear receptors                                    | Signaling           | Hyper          | 4                              | 1.57 $\pm$ 0.16                     |
| A disintegrin and metalloproteinase (ADAM) 17 precursor                                        | Regulation of tumor necrosis factor signaling                      | Signaling           | Hyper          | 2, 4                           | -1.30 $\pm$ 0.07                    |
| Class 1 helical cytokine receptor                                                              | Cytokine signal transduction                                       | Signaling           | Hyper          | 12                             | -1.59 $\pm$ 0.08                    |
| GTP cyclohydrolase 1                                                                           | Regulation of nitrous oxide production                             | Signaling           | Hyper          | 2                              | 1.54 $\pm$ 0.10                     |
| Regulator of G-protein signaling 14                                                            | Regulation of G-protein receptor signal transduction               | Signaling           | Hyper          | 12                             | -1.39 $\pm$ 0.08                    |
| Short chain dehydrogenase/reductase                                                            | Regulation of steroid hormone activity                             | Signaling           | Hyper / Hypo   | 1/2                            | -1.39 $\pm$ 0.10 / -1.37 $\pm$ 0.06 |
| $\alpha$ -2-HS glycoprotein                                                                    | Regulation of insulin like growth factor-1 signaling               | Signaling           | Hypo           | 2                              | -1.49 $\pm$ 0.07                    |
| Pellino 1                                                                                      | Scaffold protein for intracellular receptors                       | Signaling           | Hypo           | 2                              | -1.67 $\pm$ 0.06                    |
| Receptor-associated protein of the synapse                                                     | Stabilization of transmembrane receptors                           | Signaling           | Hypo           | 2                              | -1.49 $\pm$ 0.07                    |
| Retinoid X receptor $\beta$                                                                    | Regulation of steroid receptor activity                            | Signaling           | Hypo           | 2                              | 1.61 $\pm$ 0.08                     |
| Scavenger receptor class B, member 2                                                           | Regulation of cell adhesion                                        | Signaling           | Hypo           | 2                              | 1.46 $\pm$ 0.10                     |
| Xenotropic and polytropic retrovirus receptor                                                  | G-protein receptor signal transduction                             | Signaling           | Hypo           | 12                             | 1.36 $\pm$ 0.06                     |
| B. Signal transduction genes during osmotic stress in <i>Gillichthys mirabilis</i>             |                                                                    |                     |                |                                |                                     |
| Lyn tyrosine kinase                                                                            | Propagation of receptor tyrosine kinase signal transduction        | Signaling           | Hyper          | 1                              | 1.27 $\pm$ 0.09                     |
| Receptor type tyrosine protein phosphatase $\gamma$ (RPTP $\gamma$ )                           | Regulation of receptor tyrosine kinase signal transduction         | Signaling           | Hyper          | 1                              | -1.35 $\pm$ 0.07                    |
| Myotubularin-related protein 14                                                                | Regulation of phosphatidylinositol production                      | Signaling           | Hyper          | 1                              | -1.54 $\pm$ 0.07                    |
| Casein kinase II $\beta$ subunit (CKII- $\beta$ )                                              | Putative osmosensor – kinase activity-multiple substrates          | Signaling           | Hyper          | 12                             | -1.32 $\pm$ 0.10                    |
| SCY-1 like protein                                                                             | Kinase activity – regulation of protein transport                  | Signaling           | Hypo           | 1                              | -1.59 $\pm$ 0.06                    |
| Protein arginine methyltransferase 5 isoform 1                                                 | JAK/STAT signal transduction                                       | Signaling           | Hypo           | 2                              | 1.34 $\pm$ 0.06                     |
| C. Osmotic effectors during osmotic stress in <i>Gillichthys mirabilis</i> – Ion homeostasis   |                                                                    |                     |                |                                |                                     |
| System N amino acid transporter 1 (SNAT-1)                                                     | Sodium ion transport                                               | Ion homeostasis     | Hyper          | 4, 12                          | 1.96 $\pm$ 0.07                     |
| Carbonic anhydrase                                                                             | Regulation of hydrogen ion homeostasis – pH regulation             | Ion homeostasis     | Hyper          | 1, 4                           | 1.92 $\pm$ 0.16                     |
| Sodium/sialic acid co-transporter                                                              | Sodium ion transport                                               | Ion homeostasis     | Hyper          | 4                              | -1.45 $\pm$ 0.08                    |
| Potassium channel auxiliary subunit                                                            | Potassium ion transport                                            | Ion homeostasis     | Hypo           | 2                              | -1.67 $\pm$ 0.12                    |
| D. Osmotic effectors during osmotic stress in <i>Gillichthys mirabilis</i> – Organic osmolytes |                                                                    |                     |                |                                |                                     |
| Arginase II precursor                                                                          | Regulation of urea production                                      | Osmolyte            | Hyper          | 4                              | 2.10 $\pm$ 0.24                     |
| E. Osmotic effectors during osmotic stress in <i>Gillichthys mirabilis</i> – Cytoskeleton      |                                                                    |                     |                |                                |                                     |
| 55kDa erythrocyte membrane protein                                                             | Stabilization of cell shape through cytoskeletal membrane linkages | Cytoskeleton        | Hyper          | 12                             | 1.33 $\pm$ 0.12                     |
| MID1 interacting protein                                                                       | Stabilization of microtubules                                      | Cytoskeleton        | Hyper          | 2                              | -1.64 $\pm$ 0.06                    |
| Nebulin                                                                                        | Bind and stabilize F-actin                                         | Cytoskeleton        | Hyper          | 2, 4, 12                       | 2.02 $\pm$ 0.23                     |
| Ankyrin-repeat domain containing protein 40                                                    | Regulation of cytoskeletal – membrane protein interactions         | Cytoskeleton        | Hypo           | 12                             | -1.23 $\pm$ 0.07                    |
| Shroom 2                                                                                       | Regulation of cell shape via F-actin interaction                   | Cytoskeleton        | Hypo           | 1                              | -1.23 $\pm$ 0.07                    |
| BTB (PDZ) domain containing protein 14                                                         | Regulation of cytoskeletal – membrane protein interactions         | Cytoskeleton        | Hypo           | 12                             | 3.06 $\pm$ 0.06                     |

|                                           |                                                                 |              |      |       |            |
|-------------------------------------------|-----------------------------------------------------------------|--------------|------|-------|------------|
| Kelch and BTB domain containing protein 2 | Adaptor protein for ubiquitin ligases regulating cell shape     | Cytoskeleton | Hypo | 4, 12 | -1.32±0.07 |
| Numb-binding protein 2                    | Regulation of cytoskeletal – membrane protein interactions      | Cytoskeleton | Hypo | 12    | 1.38±0.07  |
| Myosin light chain 1                      | Mediate cell contractile events – possibly during cell motility | Cytoskeleton | Hypo | 1     | 1.27±0.09  |
| Plectin 1                                 | Stabilization of cytoskeletal intermediate filament network     | Cytoskeleton | Hypo | 12    | 1.42±0.08  |
| Ankyrin 2                                 | Regulation of cytoskeletal – membrane protein interactions      | Cytoskeleton | Hypo | 2, 4  | -1.59±0.05 |

#### F. Osmotic effectors during osmotic stress in *Gillichthys mirabilis* – Extracellular matrix

|                                                           |                                                               |     |              |          |                         |
|-----------------------------------------------------------|---------------------------------------------------------------|-----|--------------|----------|-------------------------|
| Bullous pemphigoid antigen 1                              | Linker protein mediating cytoskeletal-ECM interaction         | ECM | Hyper        | 2        | 1.32±0.09               |
| Tissue transglutaminase                                   | Regulation of cell adhesion – catalyzes protein cross-linking | ECM | Hyper        | 2, 4     | 1.88±0.01               |
| Tubulointerstitial nephritis antigen precursor (Gm_40e12) | Regulation of cell adhesion via integrin interaction          | ECM | Hyper        | 12       | 1.80±0.11               |
| α parvin                                                  | Regulation of cell adhesion via integrin interaction          | ECM | Hypo         | 2        | -1.45±0.09              |
| Fibrinogen, α chain                                       | Regulation of cell adhesion via formation of fibrin           | ECM | Hypo         | 2        | -1.75±0.06              |
| Laminin β-1 chain precursor                               | Regulation of adhesion, migration and tissue organization     | ECM | Hyper / Hypo | 1 / 12   | -1.54±0.08 / -1.59±0.05 |
| Mucin-4                                                   | Putative osmosensor – anti-adhesive properties                | ECM | Hyper        | 12       | -1.28±0.09              |
| Intra-α trypsin inhibitor heavy chain 3 (Gm_AB08)         | Stabilization of the ECM                                      | ECM | Hypo         | 2, 4     | -1.67±0.06              |
| Inter-α trypsin inhibitor heavy chain 3A                  | Stabilization of the ECM                                      | ECM | Hypo         | 2, 4, 12 | -1.69±0.05              |

#### G. Osmotic effectors during osmotic stress in *Gillichthys mirabilis* – Amino acid metabolism

|                                      |                                            |                 |              |           |                         |
|--------------------------------------|--------------------------------------------|-----------------|--------------|-----------|-------------------------|
| Pepsin A precursor                   | Broad specificity proteolytic activity     | a.a. metabolism | Hyper / Hypo | 1 / 2, 4  | -1.39±0.09 / -1.42±0.05 |
| Tyrosine aminotransferase            | Regulation of free amino acid availability | a.a. metabolism | Hyper / Hypo | 1 / 1     | -1.59±0.07 / -1.79±0.06 |
| Threonine deaminase                  | Regulation of free amino acid availability | a.a. metabolism | Hyper        | 2         | 1.53±0.15               |
| Alanine-glyoxalate amino transferase | Glyoxylate metabolism                      | a.a. metabolism | Hyper / Hypo | 2 / 2, 12 | -1.43±0.06 / -1.67±0.13 |

#### H. Osmotic effectors during osmotic stress in *Gillichthys mirabilis* – Calcium ion homeostasis

|                                |                                             |                     |       |       |            |
|--------------------------------|---------------------------------------------|---------------------|-------|-------|------------|
| Cytochrome P450 24A1 (Gm_CD22) | Regulation of vitamin D synthesis           | Calcium homeostasis | Hyper | 4, 12 | 1.55±0.08  |
| Otopetrin                      | Regulation of calcium deposition in otolith | Calcium homeostasis | Hyper | 12    | -2.13±0.13 |
| Grancalcin                     | Regulation of calcium ion availability      | Calcium homeostasis | Hypo  | 12    | -1.49±0.07 |
| Parvalbumin-like protein       | Regulation of calcium ion availability      | Calcium homeostasis | Hypo  | 2     | -1.59±0.07 |
| Stromal interacting molecule   | Regulation of calcium ion availability      | Calcium homeostasis | Hypo  | 12    | -1.67±0.11 |

#### I. Osmotic effectors during osmotic stress in *Gillichthys mirabilis* – Cell cycle

|                                                            |                                                             |            |       |       |            |
|------------------------------------------------------------|-------------------------------------------------------------|------------|-------|-------|------------|
| Growth arrest and DNA damage inducible protein 45 (GADD45) | Regulation of cell cycle arrest                             | Cell cycle | Hypo  | 2     | -1.67±0.10 |
| RAD 54                                                     | Regulation of chromosomal recombination                     | Cell cycle | Hypo  | 2, 4  | -1.47±0.09 |
| Histone H2B                                                | Regulation of chromatin structure                           | Cell cycle | Hypo  | 2     | 2.96±0.26  |
| Kelch-like protein 13                                      | Adaptor protein for ubiquitin ligases regulating cell cycle | Cell cycle | Hyper | 12    | -1.54±0.07 |
| Etoposide induced 2.4 mRNA isoform 1                       | Induction of apoptosis                                      | Cell cycle | Hyper | 1     | -1.56±0.07 |
| Histone H1 family, member 0                                | Regulation of chromatin structure                           | Cell cycle | Hyper | 4, 12 | -1.89±0.08 |
| Myeloid leukemia differentiation protein                   | Regulation of cell proliferation                            | Cell cycle | Hyper | 4     | 1.62±0.14  |

#### J. Osmotic effectors during osmotic stress in *Gillichthys mirabilis* – Iron homeostasis

|                                                           |                              |                  |              |                  |                         |
|-----------------------------------------------------------|------------------------------|------------------|--------------|------------------|-------------------------|
| Serotransferrin I                                         | Iron ion transport           | Iron homeostasis | Hypo         | 4                | -1.61±0.06              |
| Serotransferrin I precursor (Gm_AK17)                     | Iron ion transport           | Iron homeostasis | Hyper / Hypo | 2, 12 / 2, 4, 12 | -1.28±0.06 / -1.67±0.05 |
| Feline leukemia virus subgroup C receptor related protein | Exporter of cytoplasmic heme | Iron homeostasis | Hyper        | 12               | -1.49±0.10              |
| Hemopexin-like protein                                    | Iron ion transport           | Iron homeostasis | Hyper        | 12               | 1.52±0.08               |

K. Osmotic effectors during osmotic stress in *Gillichthys mirabilis* – Molecular degradation

|                                               |                                                                                         |                       |              |                 |                       |
|-----------------------------------------------|-----------------------------------------------------------------------------------------|-----------------------|--------------|-----------------|-----------------------|
| $\gamma$ interferon lysosomal thiol reductase | Facilitates protein unfolding for degradation in lysosome                               | Molecular degradation | Hyper        | 12              | -1.49±0.07            |
| Cytochrome P450 1A1 (Gm_BM11)                 | Oxidation of steroids or fatty acids                                                    | Molecular degradation | Hyper / Hypo | 4, 12 / 1, 2, 4 | 1.87±0.30 / 2.58±0.18 |
| Microsomal glutathione S transferase          | Remediation of oxidative stress                                                         | Molecular degradation | Hypo         | 2               | -1.22±0.06            |
| Myeloperoxidase precursor                     | Anti-apoptotic properties responsive to oxidative stress                                | Molecular degradation | Hyper        | 2               | 1.57±0.07             |
| Arylsulfatase A precursor                     | Desulfation of lipid rafts-may reduce Na <sup>+</sup> , K <sup>+</sup> -ATPase activity | Molecular degradation | Hypo         | 12              | 2.00±0.15             |
| Peroxisomal N1-acetyl-spermine oxidase        | Regulation of polyamine homeostasis                                                     | Molecular degradation | Hypo         | 12              | -1.37±0.06            |

L. Osmotic effectors during osmotic stress in *Gillichthys mirabilis* – Protein synthesis

|                                                       |                                      |                   |       |       |            |
|-------------------------------------------------------|--------------------------------------|-------------------|-------|-------|------------|
| 40S ribosomal protein S8                              | Regulation of protein synthesis      | Protein synthesis | Hyper | 2     | -1.64±0.05 |
| 40S ribosomal protein 27A                             | Regulation of protein synthesis      | Protein synthesis | Hypo  | 1     | 1.70±0.12  |
| 60S ribosomal protein L38                             | Regulation of protein synthesis      | Protein synthesis | Hypo  | 1     | 1.90±0.15  |
| Ribosomal protein L7                                  | Regulation of protein synthesis      | Protein synthesis | Hypo  | 2, 12 | -1.89±0.07 |
| Eukaryotic translation initiation factor 4 $\gamma$ 2 | Regulation of translation initiation | Protein synthesis | Hyper | 4, 12 | 1.92±0.13  |

M. Osmotic effectors during osmotic stress in *Gillichthys mirabilis* – Protein trafficking

|                                                            |                                                          |                     |              |              |                         |
|------------------------------------------------------------|----------------------------------------------------------|---------------------|--------------|--------------|-------------------------|
| Mannose receptor C type 2 (Gm_AI03)                        | Regulation of receptor mediated endocytosis              | Protein trafficking | Hyper / Hypo | 1, 2 / 1, 2  | -1.67±0.07 / -1.96±0.07 |
| $\beta$ 1, 3 galactosyl transferase 7                      | Regulation of post-translational protein glycosylation   | Protein trafficking | Hyper / Hypo | 1 / 4        | -1.20±0.07 / -1.37±0.06 |
| Secretory carrier-associated membrane protein 1 (Gm_34d11) | Carrier of recycled protein to the cell surface          | Protein trafficking | Hyper / Hypo | 4, 12 / 1, 2 | -1.25±0.10 / 1.22±0.07  |
| ADP-ribosylation factor-like protein 8                     | Small GTPase affecting protein transport                 | Protein trafficking | Hyper        | 12           | -1.35±0.08              |
| Hermansky-pudlak syndrome 1                                | Regulation of intracellular protein sorting              | Protein trafficking | Hyper        | 2, 4         | -1.30±0.07              |
| $\alpha$ 1, 3 glucosyl-transferase 8                       | Regulation of post-translational protein glycosylation   | Protein trafficking | Hyper        | 12           | 1.23±0.08               |
| TBC1 domain family member 17                               | Small GTPase affecting protein transport                 | Protein trafficking | Hyper        | 1            | 1.50±0.08               |
| Vacuolar sorting protein 45A                               | Regulation of vesicle – mediated transport through Golgi | Protein trafficking | Hypo         | 2            | -1.32±0.09              |
| Protein disulfide isomerase A6 precursor                   | Rearrangement of disulfide bonds in proteins             | Protein trafficking | Hypo         | 1            | -1.19±0.06              |

N. Osmotic effectors during osmotic stress in *Gillichthys mirabilis* – Proteolysis

|                                            |                                         |             |              |       |                         |
|--------------------------------------------|-----------------------------------------|-------------|--------------|-------|-------------------------|
| Elastase 1 precursor                       | Hydrolysis of proteins-possibly IGFBP-1 | Proteolysis | Hyper / Hypo | 2 / 4 | -1.49±0.07 / -1.62±0.06 |
| Serine protease inhibitor clade A member 1 | Elastase inhibitor                      | Proteolysis | Hyper        | 2     | -1.64±0.07              |
| Elastase 4-like protein                    | Hydrolysis of proteins-possibly IGFBP-1 | Proteolysis | Hypo         | 2     | -1.39±0.08              |
| RING finger protein 87                     | Ubiquitin ligase activity               | Proteolysis | Hyper        | 12    | -1.37±0.08              |

O. Osmotic effectors during osmotic stress in *Gillichthys mirabilis* – Transcription regulation

|                                                               |                                                       |                          |       |       |            |
|---------------------------------------------------------------|-------------------------------------------------------|--------------------------|-------|-------|------------|
| Butyrate response factor 2 (Gm_15e01)                         | Regulation of the response to growth factors          | Transcription regulation | Hyper | 2, 4  | 1.82±0.18  |
| CCAAT/enhancer binding protein $\Delta$ (Gm_14h20)            | Regulation of the response to MAPK signaling          | Transcription regulation | Hyper | 2, 4  | 3.24±0.35  |
| C-ets-2 protein                                               | Regulation of the response to MAPK signaling          | Transcription regulation | Hyper | 12    | -1.85±0.09 |
| Hepatic leukemia factor                                       | Regulation of the response to cytokine signaling      | Transcription regulation | Hyper | 4, 12 | 2.48±0.22  |
| Nuclear factor interleukin 3 regulated (Gm_17e08)             | Regulation of the response to growth factors          | Transcription regulation | Hyper | 4, 12 | 1.66±0.14  |
| Sox 21                                                        | Regulation of cellular differentiation events         | Transcription regulation | Hyper | 1     | -1.49±0.08 |
| Tob1 protein (Gm_AC09)                                        | Cell growth regulation – anti-proliferative activity  | Transcription regulation | Hyper | 4, 12 | 1.77±0.10  |
| Transcription factor Sp1                                      | Regulation of the response to MAPK signaling          | Transcription regulation | Hyper | 4, 12 | -1.32±0.10 |
| Chick ovalbumin upstream promoter (COUP) transcription factor | Regulation of the response to glucocorticoids         | Transcription regulation | Hypo  | 4     | -1.33±0.07 |
| General negative regulator of transcription subunit 1         | Transcriptional regulation of stress responsive genes | Transcription regulation | Hypo  | 12    | 1.50±0.10  |
| Nucleolar protein 11                                          | Regulation of rRNA transcription                      | Transcription regulation | Hypo  | 1     | -1.56±0.05 |
| Something about silencing protein 10                          | Promotion of gene silencing-chromatin structure       | Transcription regulation | Hypo  | 1     | -1.35±0.06 |
| Zinc fingers and homeoboxes 3                                 | Repression of transcription                           | Transcription regulation | Hypo  | 12    | -1.54±0.07 |

P. Osmotic effectors during osmotic stress in *Gillichthys mirabilis* – Cholesterol metabolism

|                                              |                                      |                        |       |   |            |
|----------------------------------------------|--------------------------------------|------------------------|-------|---|------------|
| Apolipoprotein L                             | Regulation of cholesterol production | Cholesterol metabolism | Hyper | 1 | 1.66±0.24  |
| Apolipoprotein A                             | Regulation of cholesterol production | Cholesterol metabolism | Hypo  | 4 | -1.43±0.05 |
| Cholesteryl ester transfer protein precursor | Transport of cholesterol             | Cholesterol metabolism | Hypo  | 2 | -1.35±0.06 |

Q. Osmotic effectors during osmotic stress in *Gillichthys mirabilis* – Energy/Metabolism

|                                                                  |                                           |                   |              |              |                         |
|------------------------------------------------------------------|-------------------------------------------|-------------------|--------------|--------------|-------------------------|
| 6-phosphofructo-2-kinase/fructose 2,6 bisphosphatase 4 (Gm_BN17) | Aerobic carbohydrate metabolism           | Energy/metabolism | Hyper        | 12           | 2.02±0.13               |
| Adenine nucleotide translocator S598                             | ATP transport                             | Energy/metabolism | Hyper        | 1            | -1.52±0.08              |
| Elongation of very long chain fatty acids 3                      | Lipid biosynthesis                        | Energy/metabolism | Hyper        | 4, 12        | 1.85±0.18               |
| NADH dehydrogenase subunit 1                                     | Electron transport – ATP production       | Energy/metabolism | Hyper        | 1, 4, 12     | -1.75±0.07              |
| Succinate dehydrogenase complex subunit A                        | Aerobic carbohydrate metabolism           | Energy/metabolism | Hyper        | 1            | -1.31±0.07              |
| Butyrophilin 2A2 (Gm_46i15)                                      | Lipid metabolism                          | Energy/metabolism | Hyper        | 12           | -1.39±0.08              |
| γ-butyrobetaine dioxygenase                                      | Carnitine biosynthesis – lipid metabolism | Energy/metabolism | Hyper / Hypo | 1 / 4        | -1.39±0.07 / -1.52±0.05 |
| Glycerophosphoryl phosphodiesterase 2                            | Glycerol metabolism – lipid metabolism    | Energy/metabolism | Hyper / Hypo | 12 / 1       | -1.47±0.08 / -1.43±0.05 |
| Lactate dehydrogenase A chain (Gm_DI16)                          | Anaerobic carbohydrate metabolism         | Energy/metabolism | Hyper / Hypo | 4 / 12       | 1.54±0.09 / -1.75±0.07  |
| C1q adipose specific protein                                     | Lipid metabolism                          | Energy/metabolism | Hyper / Hypo | 12 / 1, 2, 4 | -1.47±0.08 / -1.85±0.05 |
| Cytochrome c oxidase subunit 1 (Gm_10c18)                        | Electron transport – ATP production       | Energy/metabolism | Hyper / Hypo | 1, 2, 12     | -1.92±0.05 / -1.69±0.13 |
| Glycerol-3-phosphate dehydrogenase                               | Glycerol metabolism – lipid metabolism    | Energy/metabolism | Hypo         | 4            | -1.25±0.07              |
| Lysosomal α mannosidase precursor                                | Lysosomal carbohydrate metabolism         | Energy/metabolism | Hypo         | 12           | 1.24±0.06               |
| Facilitated glucose transporter                                  | Glucose transport                         | Energy/metabolism | Hypo         | 12           | -1.64±0.13              |
| Very long chain acyl-CoA synthetase                              | Lipid metabolism                          | Energy/metabolism | Hypo         | 4            | -1.12±0.09              |

## NOTES:

-In cases of a single gene represented by multiple significant features (those proceeded by a clone ID) the feature with the strongest *P*-value was displayed

-Putative functions during osmotic stress and functional categories were assigned based upon data contained with the Gene Ontology database, UniProt and the primary literature

## Abbreviations

Hyper = significant during hyperosmotic stress

Hypo = significant during hypo-osmotic stress

ECM = extracellular matrix

a.a. = amino acid
